# Supplementary material for: Can Procalcitonin Be Dosed in Bovine Milk Using a Commercial ELISA Kit?
Source: MDPI journal article supplement (doi:10.3390/ani12030289), 2022-01-25
Supplement: s1 [file s1]

**Supplementary Material Manuscript number animals-1559933**

**Table S1.** Intra-assay (Within-Run) precision of bovine PCT kit. Legend: SD – standard deviation; CV – coefficient of variation.

| Sample | Number of Values | Mean  | SD   | CV   |
|--------|------------------|-------|------|------|
| 1      | 5                | 410.3 | 35.4 | 8.6  |
| 2      | 5                | 196.1 | 4.1  | 2.1  |
| 3      | 5                | 565.4 | 58.7 | 10.4 |
| 4      | 5                | 487.4 | 0.26 | 0.05 |
| 5      | 5                | 785.7 | 38.8 | 4.9  |

**Table S2.** Inter-assay (Run to run) precision of bovine PCT kit. Legend: SD – standard deviation; CV – coefficient of variation.

| Sample | Number of Values | Mean  | SD    | CV   |
|--------|------------------|-------|-------|------|
| 1      | 25               | 461.9 | 76.1  | 16.5 |
| 2      | 25               | 227.0 | 36.0  | 15.9 |
| 3      | 25               | 624.6 | 147.6 | 23.7 |
| 4      | 25               | 537.5 | 59.8  | 11.1 |
| 5      | 25               | 806.7 | 33.7  | 4.2  |

**Table S3.** Linearity of plasma samples serially diluted with dilution Buffer and assayed.

| Sample | Dilution | Observed (pg/mL) | Expected (pg/mL) | Recovery O/E (%) |
|--------|----------|------------------|------------------|------------------|
| 6      | -        | 381.0            |                  |                  |
|        | 2X       | 191.3            | 190.5            | 100.4            |
|        | 4X       | 94.3             | 95.6             | 98.9             |
| 7      | -        | 282.9            |                  |                  |
|        | 2X       | 137.1            | 141.5            | 96.8             |
|        | 4X       | 81.8             | 68.5             | 119.4            |
| 8      | -        | 886.5            |                  |                  |
|        | 2X       | 517.8            | 443.2            | 116.6            |
|        | 4X       | 262.5            | 273.9            | 95.8             |
| 9      | -        | 472.8            |                  |                  |
|        | 2X       | 247.7            | 236.1            | 104.9            |
|        | 4X       | 122.4            | 123.8            | 98.8             |
| 10     | -        | 160.6            |                  |                  |
|        | 2X       | 86.1             | 80.3             | 107.1            |
|        | 4X       | 44.2             | 43.0             | 102.3            |
